# Supplementary material
Source: PubMed Central journal article supplement (PMC1785268)

I a

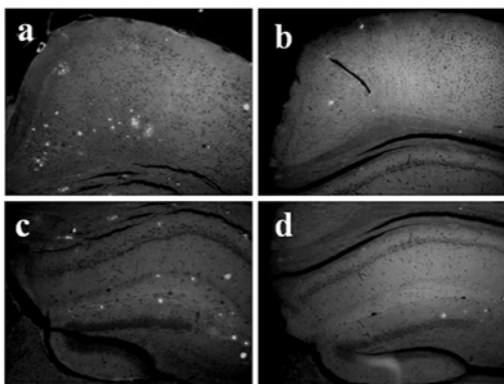

b

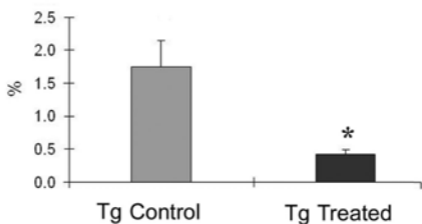

II a

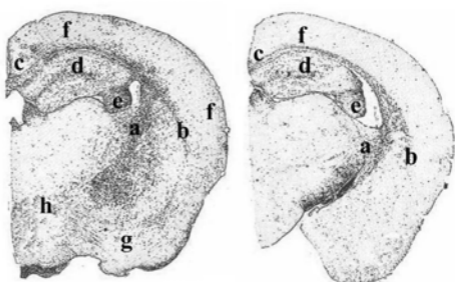

b

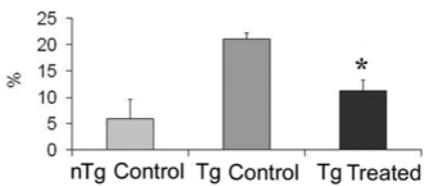

III a

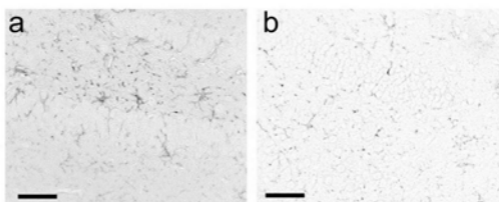

b

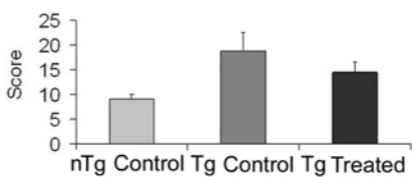

Supplement: pnas_0610180104_1.pdf [file pnas_0610180104_1.pdf]
